# Supplementary material
Source: Springer Nature journal article supplement (https://www.springermedizin.de/resource/supplementary/12931_2010_1054_MOESM1_ESM.pdf/9425532)

**A****IAR protocol**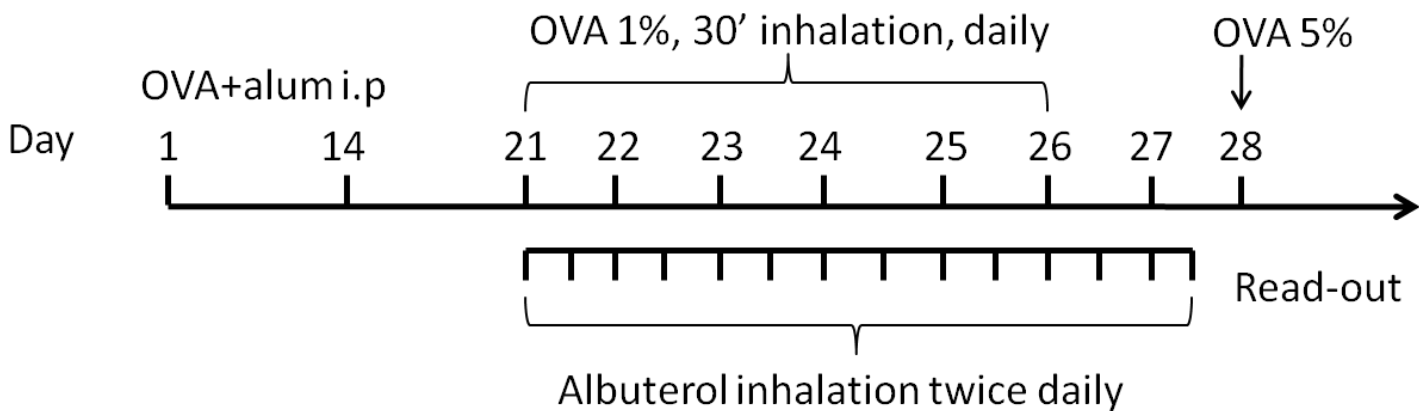**B****AHR protocol**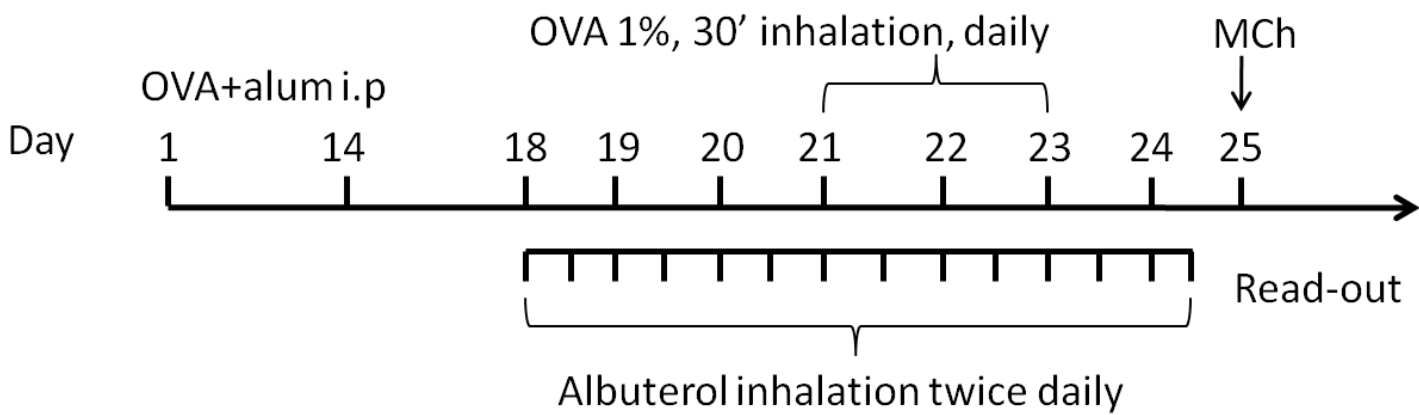

Supplement: MOESM1 [file 9425532]
